# Supplementary material for: Purified Brominated Indole Derivatives from Dicathais orbita Induce Apoptosis and Cell Cycle Arrest in Colorectal Cancer Cell Lines
Source: Mar Drugs. 2013 Oct 11;11(10):3802–22. doi: 10.3390/md11103802 (PMC3826136; doi:10.3390/md11103802)
Supplement: Supplementary File 1 — 3D structure (MOL, 1 KB) [file marinedrugs-11-03802-s001.mol]

marinedrugs-11-03802-S001.mol
  ChemDraw10311314422D

 12 13  0  0  0  0  0  0  0  0999 V2000
   -1.4045    0.1340    0.0000 C   0  0  0  0  0  0  0  0  0  0  0  0
   -1.4045   -0.6910    0.0000 C   0  0  0  0  0  0  0  0  0  0  0  0
   -0.6900   -1.1035    0.0000 C   0  0  0  0  0  0  0  0  0  0  0  0
    0.0244   -0.6910    0.0000 C   0  0  0  0  0  0  0  0  0  0  0  0
    0.0244    0.1340    0.0000 C   0  0  0  0  0  0  0  0  0  0  0  0
   -0.6900    0.5465    0.0000 C   0  0  0  0  0  0  0  0  0  0  0  0
    1.2940   -0.2785    0.0000 C   0  0  0  0  0  0  0  0  0  0  0  0
    0.8091    0.3890    0.0000 C   0  0  0  0  0  0  0  0  0  0  0  0
    0.8155   -0.8983    0.0000 N   0  0  0  0  0  0  0  0  0  0  0  0
    2.1190   -0.2785    0.0000 O   0  0  0  0  0  0  0  0  0  0  0  0
    1.2216    1.1035    0.0000 O   0  0  0  0  0  0  0  0  0  0  0  0
   -2.1190   -1.1035    0.0000 Br  0  0  0  0  0  0  0  0  0  0  0  0
  1  2  1  0      
  2  3  2  0      
  3  4  1  0      
  4  5  2  0      
  5  6  1  0      
  6  1  2  0      
  7  8  1  0      
  8  5  1  0      
  4  9  1  0      
  7  9  1  0      
  7 10  2  0      
  8 11  2  0      
  2 12  1  0      
M  END
