# Supplementary material for: Purified Brominated Indole Derivatives from Dicathais orbita Induce Apoptosis and Cell Cycle Arrest in Colorectal Cancer Cell Lines
Source: Mar Drugs. 2013 Oct 11;11(10):3802–22. doi: 10.3390/md11103802 (PMC3826136; doi:10.3390/md11103802)
Supplement: Supplementary File 2 — MOL-Document (MOL, 1 KB) [file marinedrugs-11-03802-s001-mod.mol]

marinedrugs-11-03802-S001.mol
  corina  11121305383D 1   1.00000     0.00000 
CORINA 3.49 0023  12.04.2013
 12 13  0  0  0  0  0  0  0  0999 V2000
   -0.0167    1.3821    0.0096 C   0  0  0  0  0  0  0  0  0  0  0  0
    0.0021   -0.0041    0.0020 C   0  0  0  0  0  0  0  0  0  0  0  0
    1.2016   -0.6935   -0.0127 C   0  0  0  0  0  0  0  0  0  0  0  0
    2.4048   -0.0010   -0.0204 C   0  0  0  0  0  0  0  0  0  0  0  0
    2.3825    1.4036   -0.0131 C   0  0  0  0  0  0  0  0  0  0  0  0
    1.1675    2.0893    0.0021 C   0  0  0  0  0  0  0  0  0  0  0  0
    4.5905    0.5801   -0.0391 C   0  0  0  0  0  0  0  0  0  0  0  0
    3.7882    1.8472   -0.0248 C   0  0  0  0  0  0  0  0  0  0  0  0
    3.7241   -0.4477   -0.0357 N   0  0  0  0  0  0  0  0  0  0  0  0
    5.8008    0.4977   -0.0516 O   0  0  0  0  0  0  0  0  0  0  0  0
    4.2047    2.9871   -0.0236 O   0  0  0  0  0  0  0  0  0  0  0  0
   -1.6281   -0.9623    0.0124 Br  0  0  0  0  0  0  0  0  0  0  0  0
  1  2  1  0      
  2  3  2  0      
  3  4  1  0      
  4  5  2  0      
  5  6  1  0      
  6  1  2  0      
  7  8  1  0      
  8  5  1  0      
  4  9  1  0      
  7  9  1  0      
  7 10  2  0      
  8 11  2  0      
  2 12  1  0      
M  END
$$$$
