# Supplementary material for: Purified Brominated Indole Derivatives from Dicathais orbita Induce Apoptosis and Cell Cycle Arrest in Colorectal Cancer Cell Lines
Source: Mar Drugs. 2013 Oct 11;11(10):3802–22. doi: 10.3390/md11103802 (PMC3826136; doi:10.3390/md11103802)
Supplement: Supplementary File 3 — 3D structure (MOL, 2 KB) [file marinedrugs-11-03802-s002.mol]

marinedrugs-11-03802-s002.mol
  ChemDraw10311314402D

 18 18  0  0  0  0  0  0  0  0999 V2000
   -1.8013   -0.4854    0.0000 C   0  0  0  0  0  0  0  0  0  0  0  0
   -1.8013   -1.3104    0.0000 C   0  0  0  0  0  0  0  0  0  0  0  0
   -1.0868   -1.7229    0.0000 C   0  0  0  0  0  0  0  0  0  0  0  0
   -0.3723   -1.3104    0.0000 C   0  0  0  0  0  0  0  0  0  0  0  0
   -0.3723   -0.4854    0.0000 C   0  0  0  0  0  0  0  0  0  0  0  0
   -1.0868   -0.0729    0.0000 C   0  0  0  0  0  0  0  0  0  0  0  0
    0.8972   -0.8979    0.0000 C   0  0  0  0  0  0  0  0  0  0  0  0
    0.4123   -0.2304    0.0000 C   0  0  0  0  0  0  0  0  0  0  0  0
    0.4188   -1.5177    0.0000 N   0  0  0  0  0  0  0  0  0  0  0  0
   -2.5157   -1.7229    0.0000 Br  0  0  0  0  0  0  0  0  0  0  0  0
    1.5147   -0.8426    0.0000 S   0  0  0  0  0  0  0  0  0  0  0  0
    2.2292   -1.2551    0.0000 C   0  0  0  0  0  0  0  0  0  0  0  0
    0.8657    0.8979    0.0000 O   0  0  0  0  0  0  0  0  0  0  0  0
    1.6907    0.8979    0.0000 S   0  0  0  0  0  0  0  0  0  0  0  0
    1.6907    1.7229    0.0000 O   0  0  0  0  0  0  0  0  0  0  0  0
    1.6907    0.0729    0.0000 O   0  0  0  0  0  0  0  0  0  0  0  0
    2.5157    0.8979    0.0000 O   0  5  0  0  0  0  0  0  0  0  0  0
    1.4432   -0.7521    0.0000 C   0  0  0  0  0  0  0  0  0  0  0  0
  1  2  1  0      
  2  3  2  0      
  3  4  1  0      
  4  5  2  0      
  5  6  1  0      
  6  1  2  0      
  7  8  1  0      
  8  5  1  0      
  4  9  1  0      
  7  9  1  0      
  2 10  1  0      
  7 11  1  0      
 11 12  1  0      
  8 13  1  0      
 13 14  1  0      
 14 15  2  0      
 14 16  2  0      
 14 17  1  0      
M  CHG  1  17  -1
M  STY  1   1 SUP
M  SLB  1   1   1
M  SAL   1  2  11  12
M  SBL   1  1  12
M  SMT   1 SCH3
M  SBV   1 12   -7.1724    4.5405
M  STY  1   2 SUP
M  SLB  1   2   2
M  SAL   2  6  13  14  15  16  17  18
M  SBL   2  1  14
M  SMT   2 OSO3-X+
M  SBV   2 14   -7.3365    5.6136
M  END
