# Supplementary material for: Purified Brominated Indole Derivatives from Dicathais orbita Induce Apoptosis and Cell Cycle Arrest in Colorectal Cancer Cell Lines
Source: Mar Drugs. 2013 Oct 11;11(10):3802–22. doi: 10.3390/md11103802 (PMC3826136; doi:10.3390/md11103802)
Supplement: Supplementary File 4 — MOL-Document (MOL, 2 KB) [file marinedrugs-11-03802-s002-mod.mol]

marinedrugs-11-03802-s002.mol
  corina  11121305383D 1   1.00000     0.00000 
CORINA 3.49 0023  12.04.2013
 18 18  0  0  0  0  0  0  0  0999 V2000
   -0.0167    1.3797    0.0096 C   0  0  0  0  0  0  0  0  0  0  0  0
    0.0021   -0.0041    0.0020 C   0  0  0  0  0  0  0  0  0  0  0  0
    1.2032   -0.6817   -0.0126 C   0  0  0  0  0  0  0  0  0  0  0  0
    2.4090    0.0228   -0.0204 C   0  0  0  0  0  0  0  0  0  0  0  0
    2.3786    1.4086   -0.0131 C   0  0  0  0  0  0  0  0  0  0  0  0
    1.1729    2.0833    0.0020 C   0  0  0  0  0  0  0  0  0  0  0  0
    4.6685    0.6511   -0.0383 C   0  0  0  0  0  0  0  0  0  0  0  0
    3.8015    1.9207   -0.0238 C   0  0  0  0  0  0  0  0  0  0  0  0
    3.7173   -0.4635   -0.0350 N   0  0  0  0  0  0  0  0  0  0  0  0
   -1.6243   -0.9688    0.0124 Br  0  0  0  0  0  0  0  0  0  0  0  0
    5.6891    0.6030   -1.5372 S   0  0  0  0  0  0  0  0  0  0  0  0
    7.3190    0.1180   -0.9058 C   0  0  0  0  0  0  0  0  0  0  0  0
    4.0415    2.7018   -1.1961 O   0  0  0  0  0  0  0  0  0  0  0  0
    3.9697    4.2043   -0.9643 S   0  0  0  0  0  0  0  0  0  0  0  0
    3.8730    4.8269   -2.2754 O   0  0  0  0  0  0  0  0  0  0  0  0
    2.7853    4.4479   -0.1556 O   0  0  0  0  0  0  0  0  0  0  0  0
    5.1915    4.5804   -0.2701 O   0  5  0  0  0  0  0  0  0  0  0  0
   12.3190    9.8269    5.0124 C   0  0  0  0  0  0  0  0  0  0  0  0
  1  2  1  0      
  2  3  2  0      
  3  4  1  0      
  4  5  2  0      
  5  6  1  0      
  6  1  2  0      
  7  8  1  0      
  8  5  1  0      
  4  9  1  0      
  7  9  1  0      
  2 10  1  0      
  7 11  1  0      
 11 12  1  0      
  8 13  1  0      
 13 14  1  0      
 14 15  2  0      
 14 16  2  0      
 14 17  1  0      
M  CHG  1  17  -1
M  STY  1   1 SUP
M  SLB  1   1   1
M  SAL   1  2  11  12
M  SBL   1  1  12
M  SMT   1 SCH3
M  SBV   1 12   -7.1724    4.5405
M  STY  1   2 SUP
M  SLB  1   2   2
M  SAL   2  6  13  14  15  16  17  18
M  SBL   2  1  14
M  SMT   2 OSO3-X+
M  SBV   2 14   -7.3365    5.6136
M  END
$$$$
