# Supplementary material for: Purified Brominated Indole Derivatives from Dicathais orbita Induce Apoptosis and Cell Cycle Arrest in Colorectal Cancer Cell Lines
Source: Mar Drugs. 2013 Oct 11;11(10):3802–22. doi: 10.3390/md11103802 (PMC3826136; doi:10.3390/md11103802)
Supplement: Supplementary File 5 — 3D structure (MOL, 2 KB) [file marinedrugs-11-03802-s003.mol]

marinedrugs-11-03802-s003.mol
  ChemDraw10311315032D

 15 16  0  0  0  0  0  0  0  0999 V2000
   -1.7058    0.1060    0.0000 C   0  0  0  0  0  0  0  0  0  0  0  0
   -1.7058   -0.7190    0.0000 C   0  0  0  0  0  0  0  0  0  0  0  0
   -0.9913   -1.1315    0.0000 C   0  0  0  0  0  0  0  0  0  0  0  0
   -0.2769   -0.7190    0.0000 C   0  0  0  0  0  0  0  0  0  0  0  0
   -0.2769    0.1060    0.0000 C   0  0  0  0  0  0  0  0  0  0  0  0
   -0.9913    0.5185    0.0000 C   0  0  0  0  0  0  0  0  0  0  0  0
    1.0133   -0.3064    0.0000 C   0  0  0  0  0  0  0  0  0  0  0  0
    0.5078    0.3609    0.0000 C   0  0  0  0  0  0  0  0  0  0  0  0
    0.5142   -0.9263    0.0000 N   0  0  0  0  0  0  0  0  0  0  0  0
   -2.4203   -1.1315    0.0000 Br  0  0  0  0  0  0  0  0  0  0  0  0
    0.7213    1.1578    0.0000 O   0  0  0  0  0  0  0  0  0  0  0  0
    1.2729   -1.1578    0.0000 S   0  0  0  0  0  0  0  0  0  0  0  0
    0.5585   -0.7453    0.0000 C   0  0  0  0  0  0  0  0  0  0  0  0
    1.7058    0.1081    0.0000 S   0  0  0  0  0  0  0  0  0  0  0  0
    2.4203   -0.3044    0.0000 C   0  0  0  0  0  0  0  0  0  0  0  0
  1  2  1  0      
  2  3  2  0      
  3  4  1  0      
  4  5  2  0      
  5  6  1  0      
  6  1  2  0      
  7  8  1  0      
  8  5  1  0      
  4  9  1  0      
  7  9  1  0      
  2 10  1  0      
  8 11  2  0      
  7 12  1  0      
 12 13  1  0      
  7 14  1  0      
 14 15  1  0      
M  STY  1   1 SUP
M  SLB  1   1   1
M  SAL   1  2  12  13
M  SBL   1  1  13
M  SMT   1 SCH3
M  SBV   1 13   -7.2911    4.2356
M  STY  1   2 SUP
M  SLB  1   2   2
M  SAL   2  2  14  15
M  SBL   2  1  15
M  SMT   2 SCH3
M  SBV   2 15   -6.8582    5.5015
M  END
