# Supplementary material for: Purified Brominated Indole Derivatives from Dicathais orbita Induce Apoptosis and Cell Cycle Arrest in Colorectal Cancer Cell Lines
Source: Mar Drugs. 2013 Oct 11;11(10):3802–22. doi: 10.3390/md11103802 (PMC3826136; doi:10.3390/md11103802)
Supplement: Supplementary File 6 — MOL-Document (MOL, 2 KB) [file marinedrugs-11-03802-s003-mod.mol]

marinedrugs-11-03802-s003.mol
  corina  11121305383D 1   1.00000     0.00000 
CORINA 3.49 0023  12.04.2013
 15 16  0  0  0  0  0  0  0  0999 V2000
   -0.2725    0.2577   -0.3960 C   0  0  0  0  0  0  0  0  0  0  0  0
    0.0387   -1.0943   -0.4464 C   0  0  0  0  0  0  0  0  0  0  0  0
    1.3510   -1.5145   -0.3980 C   0  0  0  0  0  0  0  0  0  0  0  0
    2.3844   -0.5837   -0.2972 C   0  0  0  0  0  0  0  0  0  0  0  0
    2.0686    0.7832   -0.2463 C   0  0  0  0  0  0  0  0  0  0  0  0
    0.7299    1.1944   -0.2969 C   0  0  0  0  0  0  0  0  0  0  0  0
    4.4241    0.5241   -0.1350 C   0  0  0  0  0  0  0  0  0  0  0  0
    3.3153    1.5535   -0.1426 C   0  0  0  0  0  0  0  0  0  0  0  0
    3.7556   -0.7766   -0.2344 N   0  0  0  0  0  0  0  0  0  0  0  0
   -1.3497   -2.3709   -0.5819 Br  0  0  0  0  0  0  0  0  0  0  0  0
    3.4312    2.7594   -0.0775 O   0  0  0  0  0  0  0  0  0  0  0  0
    5.5222    0.7750   -1.5569 S   0  0  0  0  0  0  0  0  0  0  0  0
    6.6649   -0.6292   -1.4427 C   0  0  0  0  0  0  0  0  0  0  0  0
    5.3657    0.6284    1.4119 S   0  0  0  0  0  0  0  0  0  0  0  0
    5.5395   -1.1095    1.9018 C   0  0  0  0  0  0  0  0  0  0  0  0
  1  2  1  0      
  2  3  2  0      
  3  4  1  0      
  4  5  2  0      
  5  6  1  0      
  6  1  2  0      
  7  8  1  0      
  8  5  1  0      
  4  9  1  0      
  7  9  1  0      
  2 10  1  0      
  8 11  2  0      
  7 12  1  0      
 12 13  1  0      
  7 14  1  0      
 14 15  1  0      
M  STY  1   1 SUP
M  SLB  1   1   1
M  SAL   1  2  12  13
M  SBL   1  1  13
M  SMT   1 SCH3
M  SBV   1 13   -7.2911    4.2356
M  STY  1   2 SUP
M  SLB  1   2   2
M  SAL   2  2  14  15
M  SBL   2  1  15
M  SMT   2 SCH3
M  SBV   2 15   -6.8582    5.5015
M  END
$$$$
