# Supplementary material for: Purified Brominated Indole Derivatives from Dicathais orbita Induce Apoptosis and Cell Cycle Arrest in Colorectal Cancer Cell Lines
Source: Mar Drugs. 2013 Oct 11;11(10):3802–22. doi: 10.3390/md11103802 (PMC3826136; doi:10.3390/md11103802)
Supplement: Supplementary File 7 — 3D structure (MOL, 1 KB) [file marinedrugs-11-03802-s004.mol]

marinedrugs-11-03802-s004.mol
  ChemDraw10311314382D

 13 14  0  0  0  0  0  0  0  0999 V2000
   -1.6580    0.1340    0.0000 C   0  0  0  0  0  0  0  0  0  0  0  0
   -1.6580   -0.6910    0.0000 C   0  0  0  0  0  0  0  0  0  0  0  0
   -0.9435   -1.1035    0.0000 C   0  0  0  0  0  0  0  0  0  0  0  0
   -0.2290   -0.6910    0.0000 C   0  0  0  0  0  0  0  0  0  0  0  0
   -0.2290    0.1340    0.0000 C   0  0  0  0  0  0  0  0  0  0  0  0
   -0.9435    0.5465    0.0000 C   0  0  0  0  0  0  0  0  0  0  0  0
    1.0405   -0.2785    0.0000 C   0  0  0  0  0  0  0  0  0  0  0  0
    0.5556    0.3890    0.0000 C   0  0  0  0  0  0  0  0  0  0  0  0
    0.5620   -0.8983    0.0000 N   0  0  0  0  0  0  0  0  0  0  0  0
   -2.3725   -1.1035    0.0000 Br  0  0  0  0  0  0  0  0  0  0  0  0
    0.9681    1.1035    0.0000 O   0  0  0  0  0  0  0  0  0  0  0  0
    1.6580   -0.2232    0.0000 S   0  0  0  0  0  0  0  0  0  0  0  0
    2.3725   -0.6357    0.0000 C   0  0  0  0  0  0  0  0  0  0  0  0
  1  2  1  0      
  2  3  2  0      
  3  4  1  0      
  4  5  2  0      
  5  6  1  0      
  6  1  2  0      
  7  8  1  0      
  8  5  1  0      
  4  9  1  0      
  7  9  2  0      
  2 10  1  0      
  8 11  2  0      
  7 12  1  0      
 12 13  1  0      
M  STY  1   1 SUP
M  SLB  1   1   1
M  SAL   1  2  12  13
M  SBL   1  1  13
M  SMT   1 SCH3
M  SBV   1 13   -7.4417    5.5724
M  END
