# Supplementary material for: Purified Brominated Indole Derivatives from Dicathais orbita Induce Apoptosis and Cell Cycle Arrest in Colorectal Cancer Cell Lines
Source: Mar Drugs. 2013 Oct 11;11(10):3802–22. doi: 10.3390/md11103802 (PMC3826136; doi:10.3390/md11103802)
Supplement: Supplementary File 8 — MOL-Document (MOL, 1 KB) [file marinedrugs-11-03802-s004-mod.mol]

marinedrugs-11-03802-s004.mol
  corina  11121305383D 1   1.00000     0.00000 
CORINA 3.49 0023  12.04.2013
 13 14  0  0  0  0  0  0  0  0999 V2000
   -0.0167    1.3782    0.0096 C   0  0  0  0  0  0  0  0  0  0  0  0
    0.0021   -0.0041    0.0020 C   0  0  0  0  0  0  0  0  0  0  0  0
    1.2048   -0.6963   -0.0132 C   0  0  0  0  0  0  0  0  0  0  0  0
    2.4098   -0.0008   -0.0209 C   0  0  0  0  0  0  0  0  0  0  0  0
    2.3809    1.4089   -0.0131 C   0  0  0  0  0  0  0  0  0  0  0  0
    1.1742    2.0895    0.0021 C   0  0  0  0  0  0  0  0  0  0  0  0
    4.5678    0.5495   -0.0385 C   0  0  0  0  0  0  0  0  0  0  0  0
    3.8000    1.8371   -0.0243 C   0  0  0  0  0  0  0  0  0  0  0  0
    3.7096   -0.4311   -0.0356 N   0  0  0  0  0  0  0  0  0  0  0  0
   -1.6284   -0.9618    0.0130 Br  0  0  0  0  0  0  0  0  0  0  0  0
    4.2386    2.9679   -0.0224 O   0  0  0  0  0  0  0  0  0  0  0  0
    6.3225    0.3901   -0.0561 S   0  0  0  0  0  0  0  0  0  0  0  0
    6.4741   -1.4135   -0.0673 C   0  0  0  0  0  0  0  0  0  0  0  0
  1  2  1  0      
  2  3  2  0      
  3  4  1  0      
  4  5  2  0      
  5  6  1  0      
  6  1  2  0      
  7  8  1  0      
  8  5  1  0      
  4  9  1  0      
  7  9  2  0      
  2 10  1  0      
  8 11  2  0      
  7 12  1  0      
 12 13  1  0      
M  STY  1   1 SUP
M  SLB  1   1   1
M  SAL   1  2  12  13
M  SBL   1  1  13
M  SMT   1 SCH3
M  SBV   1 13   -7.4417    5.5724
M  END
$$$$
