# Supplementary material for: Purified Brominated Indole Derivatives from Dicathais orbita Induce Apoptosis and Cell Cycle Arrest in Colorectal Cancer Cell Lines
Source: Mar Drugs. 2013 Oct 11;11(10):3802–22. doi: 10.3390/md11103802 (PMC3826136; doi:10.3390/md11103802)
Supplement: Supplementary File 9 — 3D structure (MOL, 3 KB) [file marinedrugs-11-03802-s005.mol]

marinedrugs-11-03802-s005.mol
  ChemDraw11011316202D

 26 29  0  0  0  0  0  0  0  0999 V2000
    0.4459   -0.0262    0.0000 C   0  0  0  0  0  0  0  0  0  0  0  0
   -3.0969    0.3928    0.0000 C   0  0  0  0  0  0  0  0  0  0  0  0
   -3.0969   -0.4322    0.0000 C   0  0  0  0  0  0  0  0  0  0  0  0
   -2.3824   -0.8447    0.0000 C   0  0  0  0  0  0  0  0  0  0  0  0
   -1.6679   -0.4322    0.0000 C   0  0  0  0  0  0  0  0  0  0  0  0
   -1.6679    0.3928    0.0000 C   0  0  0  0  0  0  0  0  0  0  0  0
   -2.3824    0.8053    0.0000 C   0  0  0  0  0  0  0  0  0  0  0  0
   -0.3984   -0.0197    0.0000 C   0  0  0  0  0  0  0  0  0  0  0  0
   -0.8833    0.6478    0.0000 C   0  0  0  0  0  0  0  0  0  0  0  0
   -0.8768   -0.6395    0.0000 N   0  0  0  0  0  0  0  0  0  0  0  0
   -3.8113   -0.8447    0.0000 Br  0  0  0  0  0  0  0  0  0  0  0  0
    0.9917   -0.5585    0.0000 C   0  0  0  0  0  0  0  0  0  0  0  0
    3.1160   -0.3110    0.0000 C   0  0  0  0  0  0  0  0  0  0  0  0
    3.1176    0.5961    0.0000 C   0  0  0  0  0  0  0  0  0  0  0  0
    0.8694    0.6818    0.0000 N   0  0  0  0  0  0  0  0  0  0  0  0
    2.4590   -0.6721    0.0000 C   0  0  0  0  0  0  0  0  0  0  0  0
    1.6800   -0.2904    0.0000 C   0  0  0  0  0  0  0  0  0  0  0  0
    1.6901    0.5323    0.0000 C   0  0  0  0  0  0  0  0  0  0  0  0
    2.3855    0.9762    0.0000 C   0  0  0  0  0  0  0  0  0  0  0  0
   -0.4708    1.3622    0.0000 O   0  0  0  0  0  0  0  0  0  0  0  0
    0.5759   -1.3622    0.0000 O   0  0  0  0  0  0  0  0  0  0  0  0
    3.8113    1.0378    0.0000 Br  0  0  0  0  0  0  0  0  0  0  0  0
    0.3609    0.4350    0.0000 S   0  0  0  0  0  0  0  0  0  0  0  0
    0.0334    0.7625    0.0000 C   0  0  0  0  0  0  0  0  0  0  0  0
   -0.1924   -0.5269    0.0000 S   0  0  0  0  0  0  0  0  0  0  0  0
    0.1386   -0.7180    0.0000 C   0  0  0  0  0  0  0  0  0  0  0  0
  2  3  1  0      
  3  4  2  0      
  4  5  1  0      
  5  6  2  0      
  6  7  1  0      
  7  2  2  0      
  8  9  1  0      
  9  6  1  0      
  5 10  1  0      
  8 10  1  0      
  3 11  1  0      
  8  1  1  0      
  1 12  1  0      
 13 14  2  0      
 15  1  1  0      
 13 16  1  0      
 16 17  2  0      
 17 18  1  0      
 18 19  2  0      
 19 14  1  0      
  9 20  2  0      
 12 21  2  0      
 15 18  1  0      
 12 17  1  0      
 14 22  1  0      
 23 24  1  0      
  1 23  1  0      
 25 26  1  0      
  8 25  1  0      
M  STY  1   1 SUP
M  SLB  1   1   1
M  SAL   1  2  23  24
M  SBL   1  1  27
M  SMT   1 SCH3
M  SBV   1 27   -7.5419    7.1420
M  STY  1   2 SUP
M  SLB  1   2   2
M  SAL   2  2  25  26
M  SBL   2  1  29
M  SMT   2 SCH3
M  SBV   2 29   -7.2509    6.1736
M  END
