# Supplementary material for: Purified Brominated Indole Derivatives from Dicathais orbita Induce Apoptosis and Cell Cycle Arrest in Colorectal Cancer Cell Lines
Source: Mar Drugs. 2013 Oct 11;11(10):3802–22. doi: 10.3390/md11103802 (PMC3826136; doi:10.3390/md11103802)
Supplement: Supplementary File 10 — MOL-Document (MOL, 3 KB) [file marinedrugs-11-03802-s005-mod.mol]

marinedrugs-11-03802-s005.mol
  corina  11121305383D 1   1.00000     0.00000 
CORINA 3.49 0023  12.04.2013
 26 29  0  0  0  0  0  0  0  0999 V2000
   -0.0187    1.5258    0.0104 C   0  0  0  0  0  0  0  0  0  0  0  0
   -2.4802   -2.6974   -2.9613 C   0  0  0  0  0  0  0  0  0  0  0  0
   -1.2797   -2.6364   -3.6553 C   0  0  0  0  0  0  0  0  0  0  0  0
   -0.2115   -1.9262   -3.1488 C   0  0  0  0  0  0  0  0  0  0  0  0
   -0.3253   -1.2588   -1.9299 C   0  0  0  0  0  0  0  0  0  0  0  0
   -1.5400   -1.3212   -1.2288 C   0  0  0  0  0  0  0  0  0  0  0  0
   -2.6160   -2.0470   -1.7566 C   0  0  0  0  0  0  0  0  0  0  0  0
    0.0021   -0.0041    0.0020 C   0  0  0  0  0  0  0  0  0  0  0  0
   -1.4103   -0.5462    0.0126 C   0  0  0  0  0  0  0  0  0  0  0  0
    0.6042   -0.4957   -1.2407 N   0  0  0  0  0  0  0  0  0  0  0  0
   -1.1070   -3.5358   -5.3097 Br  0  0  0  0  0  0  0  0  0  0  0  0
    1.3937    2.0679   -0.0001 C   0  0  0  0  0  0  0  0  0  0  0  0
    2.4070    4.2503   -2.9711 C   0  0  0  0  0  0  0  0  0  0  0  0
    1.1936    4.1963   -3.6428 C   0  0  0  0  0  0  0  0  0  0  0  0
   -0.6443    2.0307   -1.2152 N   0  0  0  0  0  0  0  0  0  0  0  0
    2.5656    3.5878   -1.7759 C   0  0  0  0  0  0  0  0  0  0  0  0
    1.4998    2.8562   -1.2354 C   0  0  0  0  0  0  0  0  0  0  0  0
    0.2719    2.8012   -1.9138 C   0  0  0  0  0  0  0  0  0  0  0  0
    0.1350    3.4813   -3.1233 C   0  0  0  0  0  0  0  0  0  0  0  0
   -2.2564   -0.3769    0.8654 O   0  0  0  0  0  0  0  0  0  0  0  0
    2.2559    1.8898    0.8347 O   0  0  0  0  0  0  0  0  0  0  0  0
    0.9897    5.1125   -5.2845 Br  0  0  0  0  0  0  0  0  0  0  0  0
   -0.9119    2.1318    1.4683 S   0  0  0  0  0  0  0  0  0  0  0  0
   -0.9510    3.9263    1.2061 C   0  0  0  0  0  0  0  0  0  0  0  0
    0.9237   -0.6276    1.4347 S   0  0  0  0  0  0  0  0  0  0  0  0
    0.9881   -2.4150    1.1320 C   0  0  0  0  0  0  0  0  0  0  0  0
  2  3  1  0      
  3  4  2  0      
  4  5  1  0      
  5  6  2  0      
  6  7  1  0      
  7  2  2  0      
  8  9  1  0      
  9  6  1  0      
  5 10  1  0      
  8 10  1  0      
  3 11  1  0      
  8  1  1  0      
  1 12  1  0      
 13 14  2  0      
 15  1  1  0      
 13 16  1  0      
 16 17  2  0      
 17 18  1  0      
 18 19  2  0      
 19 14  1  0      
  9 20  2  0      
 12 21  2  0      
 15 18  1  0      
 12 17  1  0      
 14 22  1  0      
 23 24  1  0      
  1 23  1  0      
 25 26  1  0      
  8 25  1  0      
M  STY  1   1 SUP
M  SLB  1   1   1
M  SAL   1  2  23  24
M  SBL   1  1  27
M  SMT   1 SCH3
M  SBV   1 27   -7.5419    7.1420
M  STY  1   2 SUP
M  SLB  1   2   2
M  SAL   2  2  25  26
M  SBL   2  1  29
M  SMT   2 SCH3
M  SBV   2 29   -7.2509    6.1736
M  END
$$$$
